# Supplementary material
Source: publisher figshare collection journal article supplement (https://rs.figshare.com/ndownloader/files/39632484)
Supplement: Supplementary file 1 [file 39632484]

## Appendix A Phase transition test models

This appendix presents details on the test models used for validation. Python implementations of both models are available on the author's Github: [https://github.com/dylewsky/phase\\_transition\\_EWS](https://github.com/dylewsky/phase_transition_EWS)

### Water-vegetation model

This model, presented in [1], describes a two-dimensional lattice on which each site has nonnegative values for water quantity  $w_{i,j}$  and biomass  $B_{i,j}$ . Stochastic dynamics are defined as follows:

$$\begin{aligned} \frac{dw_{i,j}}{dt} &= R - w_{i,j} - \lambda w_{i,j} B_{i,j} \\ &\quad + D (w_{i+1,j} + w_{i,j+1} + w_{i-1,j} + w_{i,j-1} - 4w_{i,j}) + \sigma_w dW_{i,j} \\ \frac{dB_{i,j}}{dt} &= \rho B_{i,j} \left( w_{i,j} - \frac{B_{i,j}}{B_c} \right) - \mu \frac{B_{i,j}}{B_{i,j} + B_O} \\ &\quad + D (B_{i+1,j} + B_{i,j+1} + B_{i-1,j} + B_{i,j-1} - 4B_{i,j}) + \sigma_B dW_{i,j} \end{aligned} \quad (\text{A1})$$

$dW_{i,j}$  represents stochastic white noise of unit variance. Values for constants are set to:

$$\begin{aligned} D &= 0.05 \\ \lambda &= 0.12 \\ \rho &= 1 \\ B_c &= 1 \\ \mu &= 2 \\ B_O &= 1 \\ \sigma_w &= 0.025 \\ \sigma_B &= 0.0625 \end{aligned} \quad (\text{A2})$$

Global rainfall  $R$  is varied during the simulations. When it falls below  $R = R_c \approx 1.936$ , a phase transition is observed in which the system rapidly loses biomass and shifts to a stable desert equilibrium. Simulations are carried out on a  $200 \times 200$  square lattice with periodic boundary conditions and randomized starting and ending values between which  $R$  is linearly interpolated (passing through  $R_c$  in transition runs, held far from  $R_c$  in null runs).

### Sea ice percolation model

This is a dynamical model constructed to serve as a toy example of a percolation phase transition in sea ice. Water diffuses through a cubic lattice of cells, the boundaries between which are either closed or open. The percolation transition occurs when the fraction of open boundaries exceeds some threshold, so

we define a tunable temperature parameter which mediates the melting (opening) and refreezing (closing) rates of the boundaries in order to vary this ratio. At the theoretically-established critical threshold (boundary closure fraction  $p_c \approx 0.25$  in 3D), the permeation of water through the lattice undergoes an abrupt regime change. Simulations are carried out on a  $256 \times 256 \times 64$  cubic lattice with periodic boundary conditions.

## References

- [1] Dakos, V., Kéfi, S., Rietkerk, M., van Nes, E.H., Scheffer, M.: Slowing down in spatially patterned ecosystems at the brink of collapse vasilis. *American Naturalist* **177**(6) (2011). <https://doi.org/10.1086/659945>
